# Supplementary material for: Assessment of an automated capillary system for Plasmodium vivax microsatellite genotyping
Source: PubMed Central journal article supplement (PMC4546211; doi:10.1186/s12936-015-0842-9), 2015-08-21
Supplement: 12936_2015_842_MOESM2_ESM.pdf [file 12936_2015_842_MOESM2_ESM.pdf]

TTAACGAACGAGATCTTAACCTGCTAATTAGCGGTAAGT  
ACACTATATTTTTATTGAAATTGAATATAGGTAATTATAC  
ATGTTTATTCAGTGTTCAAATTAGGATATTTTTTTTATTA  
ATATTCTTTCCCTGTTCTACTATAATAATTTGTTTTTTTT  
ACTCTATTTCTCTCTTTTAAGAATGTACTTGTTTGATT  
AAATAAAGCTTCTTAGAGGAACT
