# Supplementary material for: Assessment of an automated capillary system for Plasmodium vivax microsatellite genotyping
Source: Malar J. 2015 Aug 21;14:326. doi: 10.1186/s12936-015-0842-9 (PMC4546211; doi:10.1186/s12936-015-0842-9)
Supplement: Additional file 4: — QIAxcel analysis of microsatellites 9 and 15 revealed too many alleles due to imprecision. [file 12936_2015_842_MOESM4_ESM.xlsx]

## Sheet: Additional Table 3
Additional file 4: QIAXCEL analysis of microsatellites 9 and 15 revealed too many alleles due to imprecision
Microsatellite	Allele Size	Run	Capillary	Type of Primer		Note: Primer Type 1 corresponds to labeled primers and type 2 are primers without fluorophore
MS9	173	12	2	1
MS9	156	12	3	1
MS9	156	12	4	1
MS9	165	12	5	1
MS9	172	12	6	1
MS9	165	12	7	1
MS9	172	12	8	1
MS9	173	12	9	1
MS9	172	12	10	1
MS9	172	12	11	1
MS9	172	12	12	1
MS9	172	13	2	1
MS9	166	13	3	1
MS9	172	13	4	1
MS9	172	13	5	1
MS9	165	13	6	1
MS9	172	13	7	1
MS9	172	13	8	1
MS9	172	13	9	1
MS9	172	13	10	1
MS9	172	13	11	1
MS9	172	13	12	1
MS9	172	14	2	1
MS9	156	14	3	1
MS9	156	14	4	1
MS9	172	14	5	1
MS9	156	14	6	1
MS9	176	30	3	2
MS9	160	30	4	2
MS9	161	30	5	2
MS9	170	30	6	2
MS9	176	30	7	2
MS9	170	30	8	2
MS9	177	30	9	2
MS9	176	30	10	2
MS9	177	30	11	2
MS9	177	30	12	2
MS9	177	32	3	2
MS9	177	32	4	2
MS9	170	32	5	2
MS9	177	32	6	2
MS9	177	32	7	2
MS9	171	32	8	2
MS9	177	32	9	2
MS9	176	32	10	2
MS9	177	32	11	2
MS9	176	32	12	2
MS9	177	34	3	2
MS9	177	34	4	2
MS9	176	34	5	2
MS9	161	34	6	2
MS9	161	34	7	2
MS9	176	34	8	2
MS9	160	34	9	2
MS9	171	36	3	2
MS9	155	36	4	2
MS9	156	36	5	2
MS9	165	36	6	2
MS9	171	36	7	2
MS9	164	36	8	2
MS9	171	36	9	2
MS9	171	36	10	2
MS9	172	36	11	2
MS9	172	36	12	2
MS9	172	38	3	2
MS9	172	38	4	2
MS9	166	38	5	2
MS9	172	38	6	2
MS9	171	38	7	2
MS9	165	38	8	2
MS9	172	38	9	2
MS9	171	38	10	2
MS9	172	38	11	2
MS9	171	38	12	2
MS9	172	40	3	2
MS9	172	40	4	2
MS9	172	40	5	2
MS9	156	40	6	2
MS9	156	40	7	2
MS9	172	40	8	2
MS9	155	40	9	2
MS9	171	42	3	2
MS9	156	42	4	2
MS9	156	42	5	2
MS9	165	42	6	2
MS9	171	42	7	2
MS9	165	42	8	2
MS9	172	42	9	2
MS9	172	42	10	2
MS9	172	42	11	2
MS9	173	42	12	2
MS9	172	44	3	2
MS9	172	44	4	2
MS9	165	44	5	2
MS9	172	44	6	2
MS9	172	44	7	2
MS9	165	44	8	2
MS9	172	44	9	2
MS9	172	44	10	2
MS9	172	44	11	2
MS9	172	44	12	2
MS9	172	46	3	2
MS9	172	46	4	2
MS9	171	46	5	2
MS9	156	46	6	2
MS9	156	46	7	2
MS9	172	46	8	2
MS9	155	46	9	2
MS9	176	31	3	1
MS9	159	31	4	1
MS9	161	31	5	1
MS9	170	31	6	1
MS9	176	31	7	1
MS9	169	31	8	1
MS9	177	31	9	1
MS9	176	31	10	1
MS9	177	31	11	1
MS9	177	31	12	1
MS9	176	33	3	1
MS9	176	33	4	1
MS9	170	33	5	1
MS9	177	33	6	1
MS9	176	33	7	1
MS9	169	33	8	1
MS9	177	33	9	1
MS9	175	33	10	1
MS9	176	33	11	1
MS9	175	33	12	1
MS9	176	35	3	1
MS9	176	35	4	1
MS9	175	35	5	1
MS9	161	35	6	1
MS9	161	35	7	1
MS9	177	35	8	1
MS9	160	35	9	1
MS9	170	37	3	1
MS9	154	37	4	1
MS9	156	37	5	1
MS9	165	37	6	1
MS9	171	37	7	1
MS9	165	37	8	1
MS9	172	37	9	1
MS9	172	37	10	1
MS9	172	37	11	1
MS9	172	37	12	1
MS9	172	39	3	1
MS9	171	39	4	1
MS9	165	39	5	1
MS9	171	39	6	1
MS9	171	39	7	1
MS9	164	39	8	1
MS9	172	39	9	1
MS9	170	39	10	1
MS9	172	39	11	1
MS9	170	39	12	1
MS9	172	41	3	1
MS9	172	41	4	1
MS9	172	41	5	1
MS9	156	41	6	1
MS9	156	41	7	1
MS9	171	41	8	1
MS9	156	41	9	1
MS9	171	43	3	1
MS9	156	43	4	1
MS9	156	43	5	1
MS9	165	43	6	1
MS9	172	43	7	1
MS9	165	43	8	1
MS9	172	43	9	1
MS9	172	43	10	1
MS9	172	43	11	1
MS9	173	43	12	1
MS9	171	45	3	1
MS9	172	45	4	1
MS9	165	45	5	1
MS9	172	45	6	1
MS9	172	45	7	1
MS9	164	45	8	1
MS9	172	45	9	1
MS9	171	45	10	1
MS9	172	45	11	1
MS9	172	45	12	1
MS9	171	47	3	1
MS9	172	47	4	1
MS9	171	47	5	1
MS9	156	47	6	1
MS9	156	47	7	1
MS9	172	47	8	1
MS9	156	47	9	1
MS15	247	8	2	1
MS15	262	8	3	1
MS15	262	8	4	1
MS15	248	8	4	1
MS15	254	8	5	1
MS15	247	8	6	1
MS15	254	8	7	1
MS15	247	8	8	1
MS15	248	8	9	1
MS15	248	8	10	1
MS15	247	8	11	1
MS15	248	8	12	1
MS15	248	9	2	1
MS15	254	9	3	1
MS15	248	9	4	1
MS15	247	9	5	1
MS15	254	9	6	1
MS15	248	9	7	1
MS15	248	9	8	1
MS15	248	9	9	1
MS15	248	9	10	1
MS15	248	9	11	1
MS15	248	9	12	1
MS15	247	10	2	1
MS15	262	10	3	1
MS15	248	10	4	1
MS15	262	10	4	1
MS15	247	10	5	1
MS15	262	10	6	1
MS15	244	48	3	2
MS15	258	48	4	2
MS15	259	48	5	2
MS15	245	48	5	2
MS15	250	48	6	2
MS15	244	48	7	2
MS15	250	48	8	2
MS15	245	48	9	2
MS15	245	48	10	2
MS15	245	48	11	2
MS15	246	48	12	2
MS15	245	50	3	2
MS15	244	50	4	2
MS15	250	50	5	2
MS15	245	50	6	2
MS15	244	50	7	2
MS15	249	50	8	2
MS15	244	50	9	2
MS15	244	50	10	2
MS15	245	50	11	2
MS15	245	50	12	2
MS15	245	52	3	2
MS15	244	52	4	2
MS15	245	52	5	2
MS15	259	52	6	2
MS15	246	52	7	2
MS15	259	52	7	2
MS15	245	52	8	2
MS15	259	52	9	2
MS15	243	54	3	2
MS15	258	54	4	2
MS15	258	54	5	2
MS15	244	54	5	2
MS15	250	54	6	2
MS15	243	54	7	2
MS15	250	54	8	2
MS15	243	54	9	2
MS15	244	54	10	2
MS15	245	54	11	2
MS15	247	54	12	2
MS15	244	56	3	2
MS15	244	56	4	2
MS15	250	56	5	2
MS15	245	56	6	2
MS15	244	56	7	2
MS15	249	56	8	2
MS15	244	56	9	2
MS15	244	56	10	2
MS15	245	56	11	2
MS15	246	56	12	2
MS15	244	58	3	2
MS15	243	58	4	2
MS15	244	58	5	2
MS15	258	58	6	2
MS15	245	58	7	2
MS15	259	58	7	2
MS15	244	58	8	2
MS15	258	58	9	2
MS15	243	60	3	2
MS15	257	60	4	2
MS15	258	60	5	2
MS15	245	60	5	2
MS15	249	60	6	2
MS15	244	60	7	2
MS15	250	60	8	2
MS15	243	60	9	2
MS15	244	60	10	2
MS15	245	60	11	2
MS15	247	60	12	2
MS15	244	62	3	2
MS15	243	62	4	2
MS15	249	62	5	2
MS15	243	62	6	2
MS15	242	62	7	2
MS15	249	62	8	2
MS15	243	62	9	2
MS15	243	62	10	2
MS15	245	62	11	2
MS15	246	62	12	2
MS15	244	64	3	2
MS15	243	64	4	2
MS15	244	64	5	2
MS15	258	64	6	2
MS15	244	64	7	2
MS15	258	64	7	2
MS15	244	64	8	2
MS15	258	64	9	2
MS15	246	49	3	1
MS15	260	49	4	1
MS15	260	49	5	1
MS15	246	49	5	1
MS15	252	49	6	1
MS15	245	49	7	1
MS15	253	49	8	1
MS15	246	49	9	1
MS15	246	49	10	1
MS15	247	49	11	1
MS15	248	49	12	1
MS15	247	51	3	1
MS15	247	51	4	1
MS15	252	51	5	1
MS15	247	51	6	1
MS15	247	51	7	1
MS15	252	51	8	1
MS15	246	51	9	1
MS15	246	51	10	1
MS15	247	51	11	1
MS15	248	51	12	1
MS15	246	53	3	1
MS15	246	53	4	1
MS15	246	53	5	1
MS15	260	53	6	1
MS15	247	53	7	1
MS15	261	53	7	1
MS15	246	53	8	1
MS15	260	53	9	1
MS15	244	55	3	1
MS15	259	55	4	1
MS15	260	55	5	1
MS15	246	55	5	1
MS15	252	55	6	1
MS15	245	55	7	1
MS15	252	55	8	1
MS15	245	55	9	1
MS15	246	55	10	1
MS15	247	55	11	1
MS15	249	55	12	1
MS15	246	57	3	1
MS15	246	57	4	1
MS15	252	57	5	1
MS15	246	57	6	1
MS15	247	57	7	1
MS15	252	57	8	1
MS15	246	57	9	1
MS15	246	57	10	1
MS15	247	57	11	1
MS15	249	57	12	1
MS15	246	59	3	1
MS15	246	59	4	1
MS15	245	59	5	1
MS15	260	59	6	1
MS15	246	59	7	1
MS15	260	59	7	1
MS15	246	59	8	1
MS15	259	59	9	1
MS15	245	61	3	1
MS15	259	61	4	1
MS15	259	61	5	1
MS15	245	61	5	1
MS15	252	61	6	1
MS15	245	61	7	1
MS15	252	61	8	1
MS15	245	61	9	1
MS15	246	61	10	1
MS15	247	61	11	1
MS15	249	61	12	1
MS15	246	63	3	1
MS15	246	63	4	1
MS15	252	63	5	1
MS15	246	63	6	1
MS15	246	63	7	1
MS15	252	63	8	1
MS15	244	63	9	1
MS15	245	63	10	1
MS15	246	63	11	1
MS15	249	63	12	1
MS15	245	65	3	1
MS15	246	65	4	1
MS15	244	65	5	1
MS15	259	65	6	1
MS15	245	65	7	1
MS15	259	65	7	1
MS15	246	65	8	1
MS15	259	65	9	1
